# Supplementary material
Source: publisher site journal article supplement (https://www.dovepress.com/article/217672)
Supplement: Supplementary file 1 [file get_supplementary_file.php]

**Supplementary Figure 1** Primary CNS tumors occurred most commonly at the fourth ventricle (A). The statistical graphs showed the massive NM and the miliary metastases as the most frequent incidence in the intracranial (left) and intraspinal (right) groups respectively.

Supplementary Table 1 General characters of NM patients in different age courses

Supplementary Table 2 General features of NM patients with different primary tumors

Supplementary Table 3 General features of patients with NM from low-grade gliomas and high-grade gliomas

Supplementary Table 4 Intraspinal NM classification

Supplementary Table 5 Chemo-/radiotherapy strategy for the NM patients

Supplementary Table 6 Univariate and multivariate Cox regression analyses of prognostic factors for the entire cohort

Supplementary Table 7 Comparison between < 12 m and > 12 m survivors

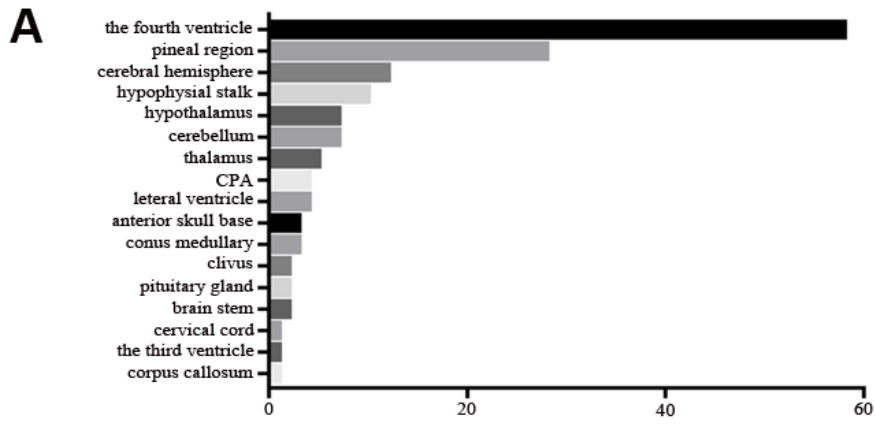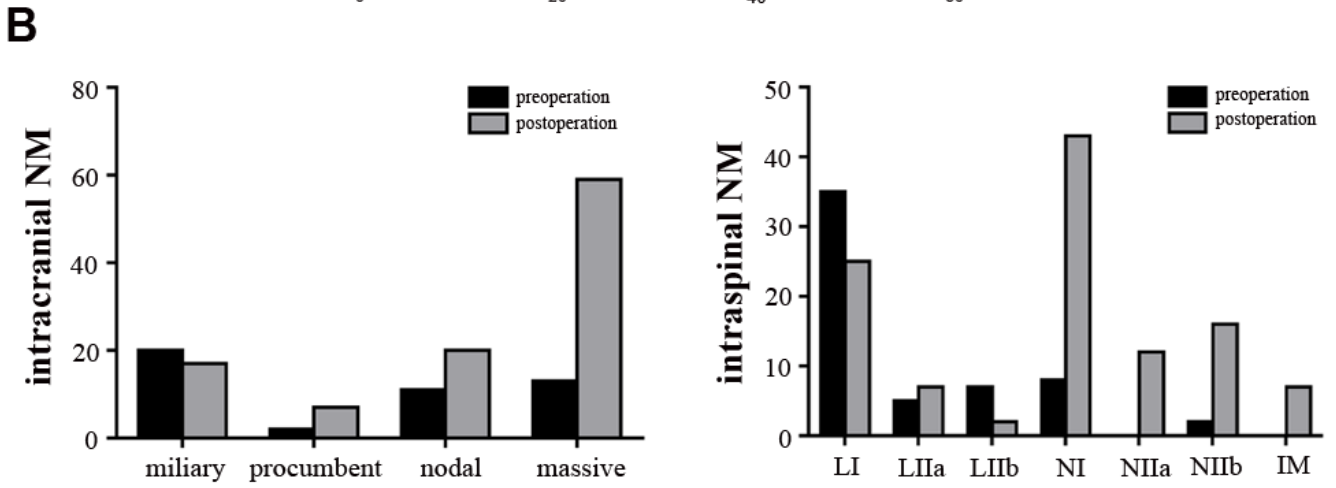

supplementary Figure 1

**Table S1 General characters of NM patients in different age courses**

|                               | <b>Children<br/>( &lt; 14 y )</b> | <b>Young Adults<br/>( 14 ~ 35 y )</b> | <b>Adult<br/>( ≥ 35 y )</b> | <b><i>p</i> value</b> |
|-------------------------------|-----------------------------------|---------------------------------------|-----------------------------|-----------------------|
| Cases (N, % )                 | 96 (48.48)                        | 63 (31.82)                            | 39 (19.70)                  | —                     |
| Gender (M : F)                | 1.82 : 1                          | 2.15 : 1                              | 2.00 : 1                    | —                     |
| Duration to NM (m)            | 8.9 (0 ~ 51)                      | 21.1 (0 ~ 168)                        | 35.7 (0 ~ 156)              | < .001                |
| Rates of coexisting NM        | 37.50%                            | 34.92%                                | 23.08%                      | < .05                 |
| The most common primary tumor | Medulloblastoma (54/96)           | GCTs (23/63)                          | Glioma (14/39)              | —                     |
| The most common NM site       | Leptomeninges                     | The third ventricle                   | Lateral ventricle           | —                     |

**Table S2 General features of NM patients with different primary tumors**

|                         | <b>Medulloblastoma</b> | <b>GCTs</b>       | <b>Glioma</b>     | <b>Ependymoma</b> | <b>PPTs</b>          | <b><i>p</i> value</b> |
|-------------------------|------------------------|-------------------|-------------------|-------------------|----------------------|-----------------------|
| Cases (N, % )           | 68 (34.34)             | 38 (19.19)        | 35 (17.68)        | 15 (7.58)         | 10 (5.05)            | —                     |
| Gender (M : F)          | 2.09 : 1               | 4.43 : 1          | 1.06 : 1          | 0.67 : 1          | 9:01                 | —                     |
| Age (median, range)     | 9.5, 2 ~ 59            | 17.5, 3 ~ 49      | 29, 3 ~ 62        | 12, 1 ~ 59        | 13, 3 ~ 58           | < .01                 |
| Duration to NM (m)      | 19.6 (0 ~ 168)         | 8.9 (0 ~ 120)     | 17.6 (0 ~ 31)     | 21.2 (0 ~ 156)    | 19.7 (0 ~ 120)       | < .001                |
| Rates of coexisting NM  | 38.00%                 | 40.74%            | 30.77%            | 38.46%            | 33.33%               | 0.207                 |
| The most common NM site | Leptomeninges          | Lateral ventricle | Lateral ventricle | Leptomeninges     | The fourth ventricle | —                     |

**Table S3 Characters of patients with low-grade and high-grade glioma**

|                         | <b>Low-grade glioma</b> | <b>High-grade glioma</b> |
|-------------------------|-------------------------|--------------------------|
| Cases (N, % )           | 11 (31.43)              | 24 (68.57)               |
| Gender (M : F)          | 0.38 : 1                | 1.67 : 1                 |
| Age (median, range)     | 33.5, 6 ~ 62            | 20.0, 3 ~ 52             |
| Duration to NM (m)      | 23.2 (3 ~ 29)           | 7.5 (0 ~ 31)             |
| Rates of coexisting NM  | 27.27%                  | 33.33%                   |
| The most common NM site | Lateral ventricle       | Lateral ventricle        |

**Table S4 Intraspinal NM classification**

| <b>Type</b> | <b>Subtype</b> | <b>Neuroimaging features</b>                | <b>No. (% , /169)</b> |
|-------------|----------------|---------------------------------------------|-----------------------|
| L           | LI             | Miliary shape                               | 60 (35.50)            |
|             | LIIa           | Procumbent pattern with extensive territory | 12 (7.10)             |
|             | LIIb           | Procumbent pattern with limited territory   | 9 (5.33)              |
| N           | NI             | Nodular shape                               | 51 (30.18)            |
|             | NIIa           | Massive pattern with irregular boundary     | 12 (7.10)             |
|             | NIIb           | Massive pattern with distinct boundary      | 18 (10.65)            |
| IM          | —              | Intramedullary metastases                   | 7 (4.14)              |

**Table S5 Chemo-/radiotherapy strategy for the NM patients**

|                                 | N (%)      |                         | N (%)      |
|---------------------------------|------------|-------------------------|------------|
| <b>Chemotherapy</b>             |            | <b>Radiotherapy</b>     |            |
| <i>Medulloblastoma</i>          |            | <i>Medulloblastoma</i>  |            |
| IFO + CBP + VM-26               | 30 (15.16) | CSI                     | 37 (18.69) |
| ACNU + DDP + VCR                | 15 (7.58)  | SRS                     | 4 (2.02)   |
| DDP + PEM                       | 8 (4.04)   | CSI + SRS               | 8 (4.04)   |
| <i>GCTs</i>                     |            | WBRT                    | 5 (2.53)   |
| IFO + CBP + VP-16               | 21 (10.61) | <i>GCTs</i>             |            |
| DDP + BLM + VM-26               | 11 (5.56)  | CSI                     | 9 (4.55)   |
| DDP + PEM                       | 4 (2.02)   | SRS                     | 7 (3.54)   |
| <i>Glioma</i>                   |            | CSI + SRS               | 8 (4.04)   |
| TMZ + CPT-11 + Endostatin       | 17 (85.86) | WBRT                    | 2 (1.01)   |
| TMZ                             | 10 (5.05)  | <i>Glioma</i>           |            |
| TMZ + CBP + VM-26               | 3 (1.52)   | CSI                     | 1 (0.51)   |
| TMZ + ACNU + VCR                | 2 (1.01)   | SRS                     | 7 (3.54)   |
| TMZ + Apatinib                  | 1 (0.51)   | CSI + SRS               | 1 (0.51)   |
| <i>Ependymal tumors</i>         |            | WBRT                    | 16 (8.08)  |
| IFO + CBP + VP-16               | 6 (3.03)   | <i>Ependymal tumors</i> |            |
| TMZ + CBP + VM-26               | 2 (1.01)   | CSI                     | 2 (1.01)   |
| <i>PPTs</i>                     |            | SRS                     | 6 (3.03)   |
| IFO + CBP + VP-16               | 6 (3.03)   | WBRT                    | 2 (1.01)   |
| ACNU + DDP + VCR                | 4 (2.02)   | <i>PPTs</i>             |            |
| <i>PNET</i>                     |            | CSI                     | 1 (0.51)   |
| IFO + CBP + VM-26               | 3 (1.52)   | SRS                     | 5 (2.53)   |
| <i>PCNSL</i>                    |            | CSI + SRS               | 2 (1.01)   |
| MTX + TMZ                       | 4 (2.02)   | WBRT                    | 2 (1.01)   |
| <i>Pituitary adenocarcinoma</i> |            | <i>PNET</i>             |            |
| Octreotide                      | 1 (0.51)   | CSI                     | 1 (0.51)   |
|                                 |            | SRS                     | 1 (0.51)   |
|                                 |            | WBRT                    | 3 (1.52)   |

**Table S6 Univariate and multivariate Cox regression analyses of prognostic factors for the entire cohort**

| <b>Variables</b>                         | <b>Univariate</b> |                | <b>Multivariate</b> |                |
|------------------------------------------|-------------------|----------------|---------------------|----------------|
|                                          | HR (95% CI)       | <i>p</i> value | HR (95% CI)         | <i>p</i> value |
| <b>Gender (M / F)</b>                    | 0.83 (0.49-1.41)  | 0.49           |                     |                |
| <b>Age (&lt; 15 y / ≥ 15 y)</b>          | 0.98 (0.96-1.00)  | 0.04           | 0.75 (0.42-2.58)    | 0.01           |
| <b>Neurological presentation (Y / N)</b> | 1.05 (0.53-2.06)  | 0.89           |                     |                |
| <b>Coexisting NM (Y / N)</b>             | 0.77 (0.68-1.86)  | 0.03           | 2.11 (1.06-3.23)    | < 0.01         |
| <b>Interval to NM (&lt; 1 y / ≥ 1 y)</b> | 2.68 (0.92-3.41)  | < 0.01         | 1.85 (1.03-3.22)    | < 0.01         |
| <b>Primary tumors</b>                    |                   |                |                     |                |
| Medulloblastoma                          | 0.63 (0.27-1.48)  | 0.29           |                     |                |
| GCTs                                     | 0.91 (0.36-2.15)  | 0.83           |                     |                |
| Glioma                                   | 0.35 (0.11-1.08)  | 0.67           |                     |                |
| Ependymal tumors                         | 0.80 (0.26-2.50)  | 0.71           |                     |                |
| PPTs                                     | 3.01 (0.94-10.11) | 0.63           |                     |                |
| others                                   | 0.83 (0.21-2.89)  | 0.88           |                     |                |
| <b>Metastatic sites</b>                  |                   |                |                     |                |
| Whole leptomeninges                      | 0.56 (0.23-1.76)  | 0.03           | 0.88 (0.23-1.78)    | 0.36           |
| Ventricular system                       | 1.15 (0.52-3.03)  | 0.48           |                     |                |
| Cerebrospinal parenchyma                 | 2.21 (1.30-3.85)  | 0.75           |                     |                |
| <b>NM types</b>                          |                   |                |                     |                |
| Miliary                                  | 0.88 (0.48-1.64)  | 0.71           |                     |                |
| Procumbent                               | 1.18 (0.37-3.74)  | 0.77           |                     |                |
| Nodal                                    | 0.60 (0.29-1.20)  | 0.01           | 0.52 (0.23-1.66)    | 0.03           |
| Massive                                  | 0.96 (0.45-2.06)  | 0.92           |                     |                |
| <b>Treatment (OP / CT or RT)</b>         | 1.03 (0.56-1.91)  | 0.93           |                     |                |



**Table S7 Comparison between < 12 m and > 12 m survivors**

|                                              | <b>&lt; 12 m survivors</b> | <b>&gt; 12 m survivors</b> | <b><i>p</i> value</b> |
|----------------------------------------------|----------------------------|----------------------------|-----------------------|
| Gender (M : F)                               | 43 : 17 (2.53)             | 73 : 35 (2.09)             | ns                    |
| Mean age at NM diagnosis, mean (SD)          | 21.7 (8)                   | 18.6 (5)                   | < 0.01                |
| Children : Adult                             | 33 : 28 (1.18)             | 52 : 55 (0.95)             | ns                    |
| Mean duration to NM diagnosis, mean (SD)     | 13.5 (4.1)                 | 22.5 (3.7)                 | < 0.0001              |
| Concurrent NM, N (%)                         | 20 (32.79%)                | 35 (32.71%)                | ns                    |
| Medulloblastoma, N (%)                       | 23 (37.70%)                | 42 (39.25%)                | ns                    |
| GCTs, N (%)                                  | 6 (9.84%)                  | 23 (21.50%)                | < 0.05                |
| Glioma, N (%)                                | 11 (18.03%)                | 17 (15.89%)                | ns                    |
| Ependymoma, N (%)                            | 5 (8.20%)                  | 8 (7.48%)                  | ns                    |
| PPTs, N (%)                                  | 6 (9.84%)                  | 4 (3.74%)                  | < 0.01                |
| LM, N (%)                                    | 17 (27.87%)                | 60 (56.07%)                | < 0.001               |
| Ventricular system, N (%)                    | 11 (18.03%)                | 25 (23.36%)                | ns                    |
| Cerebrospinal parenchyma, N (%)              | 4 (6.56%)                  | 18 (16.82%)                | ns                    |
| OP alone: Comprehensive treatment (OP+CT+RT) | 4 : 8 (0.5)                | 2 : 10 (0.2)               | < 0.05                |
